# Supplementary material for: High acid catalytic activity of aluminosilicate molecular sieves with MCM-41 structure synthesized from precursors of colloidal faujasite
Source: Royal Society of Chemistry journal article supplement (doi:10.1039/b209983g), 2002-12-19
Supplement: b209983g.pdf [file b209983g.pdf]

N<sub>2</sub> isotherm of sample ZPM-150

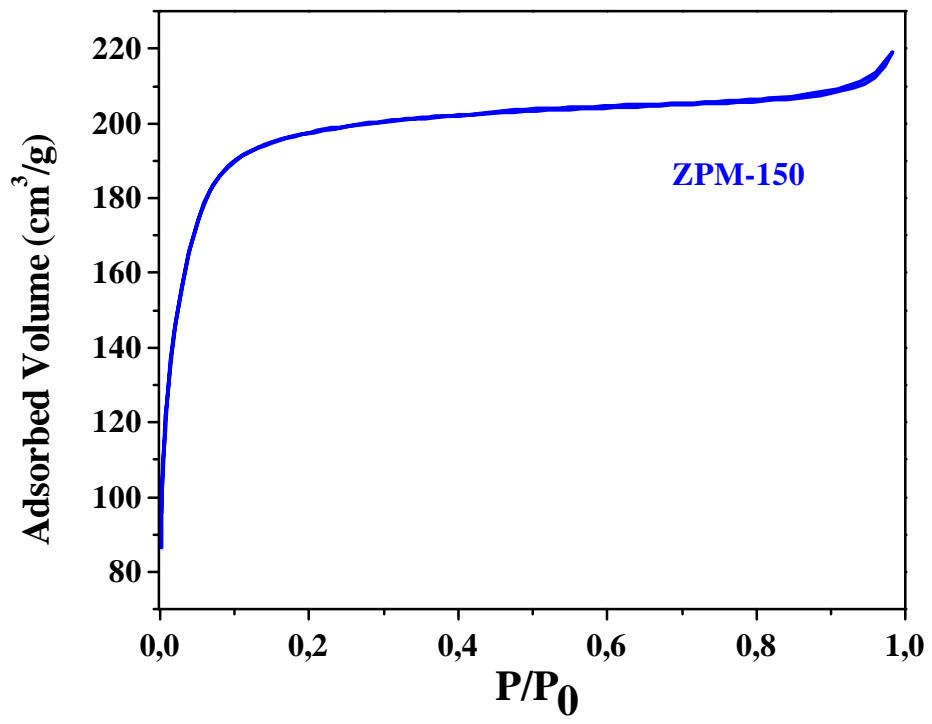

FTIR spectra of samples ZPM-150, Al-MCM-41-15 and USY

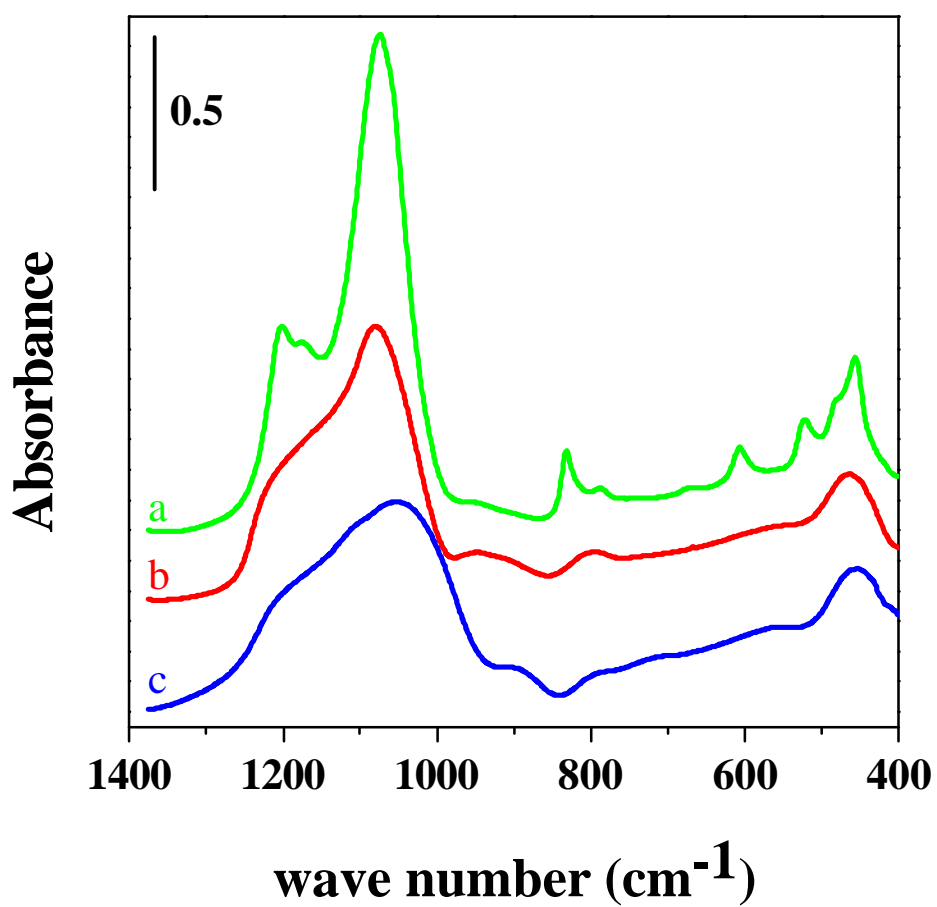

**a: USY (CBV-720);  $a_0 = 24.28 \text{ \AA}$ ; Si/Al<sub>F</sub> = 35**

**b: Al-MCM-41 (Si/Al = 15)**

**c: ZPM-150 calcined**
